# Supplementary material for: The effects of allogenic stem cells in a murine model of hind limb diabetic ischemic tissue
Source: PeerJ. 2017 Aug 21;5:e3664. doi: 10.7717/peerj.3664 (PMC5572534; doi:10.7717/peerj.3664)
Supplement: Data S1 — All animal experiments were done in three batches (1.x) where x = No animal (specific). [file peerj-05-3664-s002.xlsx]

## Sheet:  lymphocytes 40x field
Group/Rat	field 1	field 2	field 3	field 4	field 5	field 6	field 7	field 8	field 9	field 10	field 11	field 12	field 13	field 14	field 15
3.1	29	26	16	29	8	19	7	24	27	8	25	14	16	20	7
3.2	26	16	23	8	7	23	10	14	22	7	17	10	13	18	22
3.3	15	15	9	14	15	14	7	4	14	7	4	8	19	6	10
3.4	7	19	21	16	4	20	16	23	22	11	7	21	24	12	18
3.5	20	29	24	28	14	19	23	36	21	15	25	23	21	25	19
3.6	6	13	14	38	42	24	17	22	12	12	5	8	8	9	8
3.7	23	16	15	13	20	26	15	12	21	12	11	16	1	10	23
3.14	18	26	23	15	22	9	12	10	14	7	8	18	10	14	15
1.1	4	8	20	16	11	6	14	19	18	0	12	19	16	16	18
1.2	8	6	20	21	26	18	14	7	15	10	6	11	3	15	22
1.3	12	7	13	6	21	8	9	12	17	15	16	20	21	15	9
1.4	11	5	23	12	8	12	20	10	15	6	1	4	18	8	2
1.5	11	10	7	12	19	14	14	12	10	13	30	4	9	5	4
2.8	15	21	100	33	4	6	9	13	5	9	6	17	8	12	7
2.9	17	15	18	8	3	22	5	20	16	2	34	2	5	18	8
3.10	16	13	48	12	21	24	12	15	13	28	9	19	16	21	21
1.6	23	19	17	37	14	11	0	20	12	13	27	16	34	6	16
1.9	20	10	10	6	18	9	22	23	9	29	10	19	13	10	28
1.12
1.14	5	19	12	12	19	16	7	26	12	4	33	23	16	2	14
2.1	25	3	19	3	4	25	1	5	17	19	4	16	5	26	4
2.4	3	12	21	19	5	14	13	2	18	2	13	16	1	10	20
2.5	22	16	8	6	24	9	20	22	14	39	30	4	30	6	24
2.6
Treated Group	14.95±0.45
Control Group	15.51±0.94

## Sheet: Plasmatic cells 40x field
Group/Rat	field 1	field 2	field 3	field 4	field 5	field 6	field 7	field 8	field 9	field 10	field 11	field 12	field 13	field 14	field 15
3.1	23	19	26	21	25	35	10	7	15	10	37	21	11	13	20
3.2	29	19	19	11	22	10	3	10	20	9	13	17	9	25	10
3.3	19	28	19	16	18	12	15	9	34	16	5	11	6	14	13
3.5	27	27	26	13	14	3	20	18	6	12	18	13	19	11	19
3.6	7	19	11	29	20	18	12	19	9	18	12	15	10	22	7
3.7	5	23	8	24	6	9	8	7	25	41	2	4	3	24	10
3.14	20	17	14	19	7	25	13	19	11	15	28	21	24	15	4
1.1	9	18	7	23	6	9	19	11	16	16	7	11	19	12	7
1.2	14	10	29	16	38	19	4	9	4	5	2	22	34	12	6
1.3	7	12	7	14	7	10	9	9	9	10	6	15	17	11	9
1.4	15	12	9	1	15	18	8	9	7	21	3	22	14	3	18
1.5	13	9	19	7	18	15	9	11	10	8	12	7	11	18	4
2.8	26	26	21	13	3	3	7	16	12	15	3	10	18	10	13
2.9	20	2	3	15	3	17	19	19	4	17	5	10	8	21	2
3.10	29	9	51	2	11	15	12	3	9	25	3	6	10	26	41
1.6	25	16	39	30	10	20	7	15	18	23	35	14	7	11	19
1.9	9	13	15	37	14	11	19	10	5	5	8	19	11	17	18
1.12
1.14	6	5	2	2	3	4	2	3	4	7	22	15	5	15	6
2.1	9	24	29	21	13	23	5	27	19	16	22	12	13	11	30
2.4	49	25	23	3	41	25	26	19	29	20	19	13	12	28	26
2.5	15	18	24	13	26	28	28	25	27	21	13	9	25	18	25
2.6
Control Group	17.15±1.7
Treated group	13.12±0.4

## Sheet: neutrophil 40x fields
Group/Rat	field 1	field 2	field 3	field 4	field 5	field 6	field 7	field 8	field 9	field 10	field 11	field 12	field 13	field 14	field 15
3.1	6	3	5	3	5	2	3	4	4	3	2	2	1	1	3
3.2	2	2	5	5	1	9	3	2	4	1	9	1	2	6	3
3.3	4	2	0	3	2	0	0	2	2	1	0	1	1	2	1
3.4	3	2	1	0	1	0	1	3	2	2	4	3	2	1	0
3.5	3	2	5	0	5	0	8	8	9	3	6	4	3	2	4
3.6	4	2	5	5	5	2	1	2	5	3	7	4	1	2	2
3.7	6	2	5	5	5	1	3	6	5	0	1	2	1	0	0
3.14	3	2	1	3	2	2	3	6	1	5	2	9	5	4	3
1.1	8	9	8	3	1	6	0	9	6	3	4	4	1	1	7
1.2	4	2	1	3	3	3	1	10	5	4	1	3	9	4	3
1.3	6	2	5	5	5	8	3	4	6	5	6	3	5	6	4
1.4	3	2	2	3	2	0	3	5	5	6	2	3	9	7	6
1.5	9	7	5	3	7	3	0	9	0	0	5	3	2	6	4
2.8	3	3	4	9	5	4	1	5	6	7	9	3	6	6	3
2.9	4	3	1	3	1	5	0	4	3	2	4	7	0	5	9
3.10	8	1	10	2	7	2	10	4	5	1	2	3	9	5	6
1.6	3	2	3	4	2	4	1	2	3	2	2	2	2	2	3
1.9	2	2	0	1	1	3	2	1	0	3	1	8	2	5	2
1.12	5	3	3	0	9	4	1	5	6	2	3	0	1	2	0
1.14	2	4	6	2	1	2	5	7	6	2	2	3	1	2	6
2.1	1	0	3	3	4	5	2	1	3	4	3	0	1	5	4
2.4	9	2	5	6	8	2	4	3	6	5	0	2	4	2	2
2.5	1	2	3	3	4	2	3	2	3	4	4	6	2	2	3
2.6	2	0	3	5	6	1	3	0	2	5	5	3	1	5	7
Control Group		3.18±0.21
Treated Group		3.55±0.29

## Sheet: arterioles 40x fields
Group/rat	field 1	field 2	field 3	field 4	field 5	field 6	field 7	field 8	field 9	field 10	field 11	field 12	field 13	field 14	field 15
3.1	3	0	1	0	4	1	1	0	2	1	2	1	1	1	1
3.2	1	0	1	0	2	2	1	1	0	2	2	1	0	2	0
3.3	0	2	0	3	0	0	1	3	0	4	0	2	0	2	1
3.4	0	0	0	0	0	2	2	0	2	3	4	1	1	1	3
3.5	0	2	1	1	0	2	1	0	2	0	0	1	1	3	1
3.6	0	2	1	0	1	3	0	0	2	1	1	1	3	0	0
3.6	2	0	0	0	1	0	1	0	0	2	3	4	0	3	4
3.7	2	0	2	0	1	3	0	0	2	1	0	0	3	0	4
3.14	2	1	2	1	1	1	1	1	1	1	1	1	0	3	2
1.1	2	1	0	1	1	1	2	1	1	2	2	1	2	0	2
1.2	0	1	1	1	1	3	4	0	0	2	1	1	0	0	2
1.4	1	0	0	0	1	1	1	4	3	1	2	2	1	1	2
3.10	1	1	2	0	1	0	2	2	1	4	1	1	1	3	2
1.6	2	0	1	1	3	0	0	2	1	4	2	0	0	0	0
1.9	2	3	0	3	1	4	0	2	1	1	1	0	0	0	1
1.12
1.14	2	3	1	4	0	3	0	3	2	2	0	2	0	3	1
2.1	0	1	0	1	0	0	3	1	0	0	0	1	2	1	2
2.4	0	4	2	2	3	3	0	1	1	3	0	1	2	2	3
2.5	3	4	2	1	3	1	1	1	2	0	1	1	2	1	1
2.6
Treated Group		1.19±0.12
Control Group		1.39±0.11

## Sheet: capillaires 40x fields
Group/Rat	field 1	field 2	field 3	field 4	field 5	field 6	field 7	field 8	field 9	field 10	field 11	field 12	field 13	field 14	field 15
3.1	11	6	5	5	5	3	7	5	9	11	3	2	6	5	6
3.2	2	14	9	7	4	10	2	10	9	8	16	8	8	6	14
3.3	6	5	4	11	9	6	5	7	8	5	4	5	9	3	9
3.4	12	7	6	6	8	10	13	23	5	11	19	11	15	12	8
3.5	8	5	8	7	9	4	8	4	4	4	8	4	7	9	14
3.6	10	8	10	10	9	7	7	4	7	13	2	7	3	3	5
3.7	4	14	4	12	7	9	7	8	5	5	8	6	7	4	4
3.14	10	3	4	19	6	12	5	16	6	8	2	6	6	15	3
1.1	16	8	14	4	9	6	11	4	9	10	4	20	5	9	8
1.2	5	4	13	8	6	5	15	19	7	6	7	0	4	7	11
1.3	16	4	5	9	8	6	5	4	12	9	5	15	9	8	2
1.4	2	4	9	21	2	19	11	8	2	15	1	13	1	14	16
1.5	3	4	3	13	3	5	9	9	6	4	5	2	4	2	5
2.8	7	16	11	0	2	11	5	1	20	11	2	6	0	11	15
2.9	15	4	3	3	11	2	1	0	12	4	19	19	2	10	15
3.10	16	9	17	19	10	13	14	15	10	17	11	15	8	14	16
1.6	15	6	8	2	27	6	11	9	1	11	9	8	8	17	19
1.9	8	11	16	18	5	17	16	24	10	19	7	15	9	10	9
1.12
1.14	6	7	11	6	5	14	9	8	9	14	17	22	13	8	10
2.1	22	16	10	9	3	24	5	5	13	6	6	13	16	19	22
2.4	6	6	28	12	15	10	9	13	2	17	21	18	14	20	19
2.5	13	12	3	12	20	17	11	3	15	22	13	11	7	13	6
2.6
Treated Group	7.71±1.29
Control Group	12.29±0.95

## Sheet: Macrophagues 
Macrophagues Attached Nodes (Total Number in each node)
CD206+	4	16	39	18
	5	48	22	19
	22	11	13	3
	32	44	34	41
	3	1	18	40				Treated Group		499 CD206+/2047 CD68+
	2	8	8	48
								Control Group		85 CD206+/2045 CD68+
CD68+	4	66	75	40	58	80
	3	43	50	16	45	24
	20	39	23	2	15	19
	39	18	22	5	7	6
	24	27	23	20	36	7
	8	75	40	30	57	29
	15	46	58	50	62	24
	28	30	63	67	62
	3	9	59	60	50
	25	51	50	49	89
CD206+	3	4	3	1
	1	9	2	3
	10	3	6	4
	4	7	16	4
	3	1	1
CD68+	21	82	110	104	192	67	31
	157	102	150	69	66	75	91
	102	107	40	114	158	127	80

## Sheet: Follow-up
Physical parameters according to follow-up score
Follow-up (days)
	Group/rat	0	2	4	6	8	10
Cell Treatment Group	3.1	3	0	1	0	0	0
	3.2	2	1	0	0	0	0
	3.3	1	1	1	1	0	0
	3.4	1	0	1	0	0	0
	3.5	1	1	1	0	0	0
	3.6	1	1	1	0	0	0
	3.7	1	0	1	0	0	0
	3.14	1	1	1	0	0	0
	1.1	1	2	0	1	0	0
	1.2	1	1	1	0	0	0
	1.3	1	1	0	0	0	0		Follow-up score. Physical parameters
	1.4	1	1	0	1	0	0
	1.5	1	1	1	1	0	0		Weight	No changes		0
	2.7	0	Exitus							Loss 5-10%		1
	2.8	0	0	0	0	0	0			Loss 10-15%		2
	2.9	0	0	0	0	0	0			Loss 15-20%		3
	2.12	0	0	0	0	0	0			Loss more 20%		17
Control Group	3.10	2	3	3	3	3	3		General Aspect	Coat	normal	0
	1.6	1	2	2	0	2	2				altered	1
	1.7	1	Exitus								bristly	2
	1.9	0	1	0	0	1	1			dehydratation	no	0
	1.11	0	Exitus								mild	1
	1.12	0	1	0	0	0	0				moderate	2
	1.14	0	1	1	0	0	0				severe	17
	2.1	1	1	0	2	3	3			Activity	normal	0
	2.3	3	Exitus								minor	1
	2.4	1	1		1	1	2				limited	2
	2.5	0	1		1	1	1				null	17
	2.6	1	1	3	3	3	3
Ischemic parameters according to follow-up score
	Group/rat	0	2	4	6	8	10
Cell Treatment Group	3.1	0	2	2	3	2	1
	3.2	0	3	4	4	3	2		Follow-up score .Ischemic parameters.
	3.3	0	4	4	4	3	2
	3.4	0	3	2	1	0	0		Extremity	Color	normal	0
	3.5	0	3	3	1	1	0				cyanotiv	4
	3.6	0	2	2	1	2	2			Limb	No	0
	3.7	0	3	2	0	0	0				Mild	1
	3.14	0	3	2	1	1	0				Severe	2
	1.1	0	1	0	0	0	0			Contract	No	0
	1.2	0	3	2	2	1	0				Yes	2
	1.3	0	3	2	1	1	0			Ulcers	No	0
	1.4	0	3	3	1	1	0				Yes	2
	1.5	0	2	3	3	3	2			Mutilation	No	0
	2.7	0	Exitus								Yes	6
	2.8	0	3	3	2	2	1
	2.9	0	2	3	3	2	1
	2.12	0	2	1	3	2	1
Control Group	3.10	0	4	6	6	6	8
	1.6	0	0	1	0	0	0
	1.7	0	Exitus
	1.9	0	0	2	0	0	0
	1.11	0	Exitus
	1.12	0	3	2	1	2	2
	1.14	0	1	2	2	2	3
	2.1	0	3	2	2	2	3
	2.3	0	Exitus
	2.4	0	3	4	3	4	5
	2.5	0	3	5	5	5	5
	2.6	0	0	2	4	5	5
