# Supplementary material for: The effects of allogenic stem cells in a murine model of hind limb diabetic ischemic tissue
Source: PubMed Central journal article supplement (PMC5572534; doi:10.7717/peerj.3664), 2017-08-21

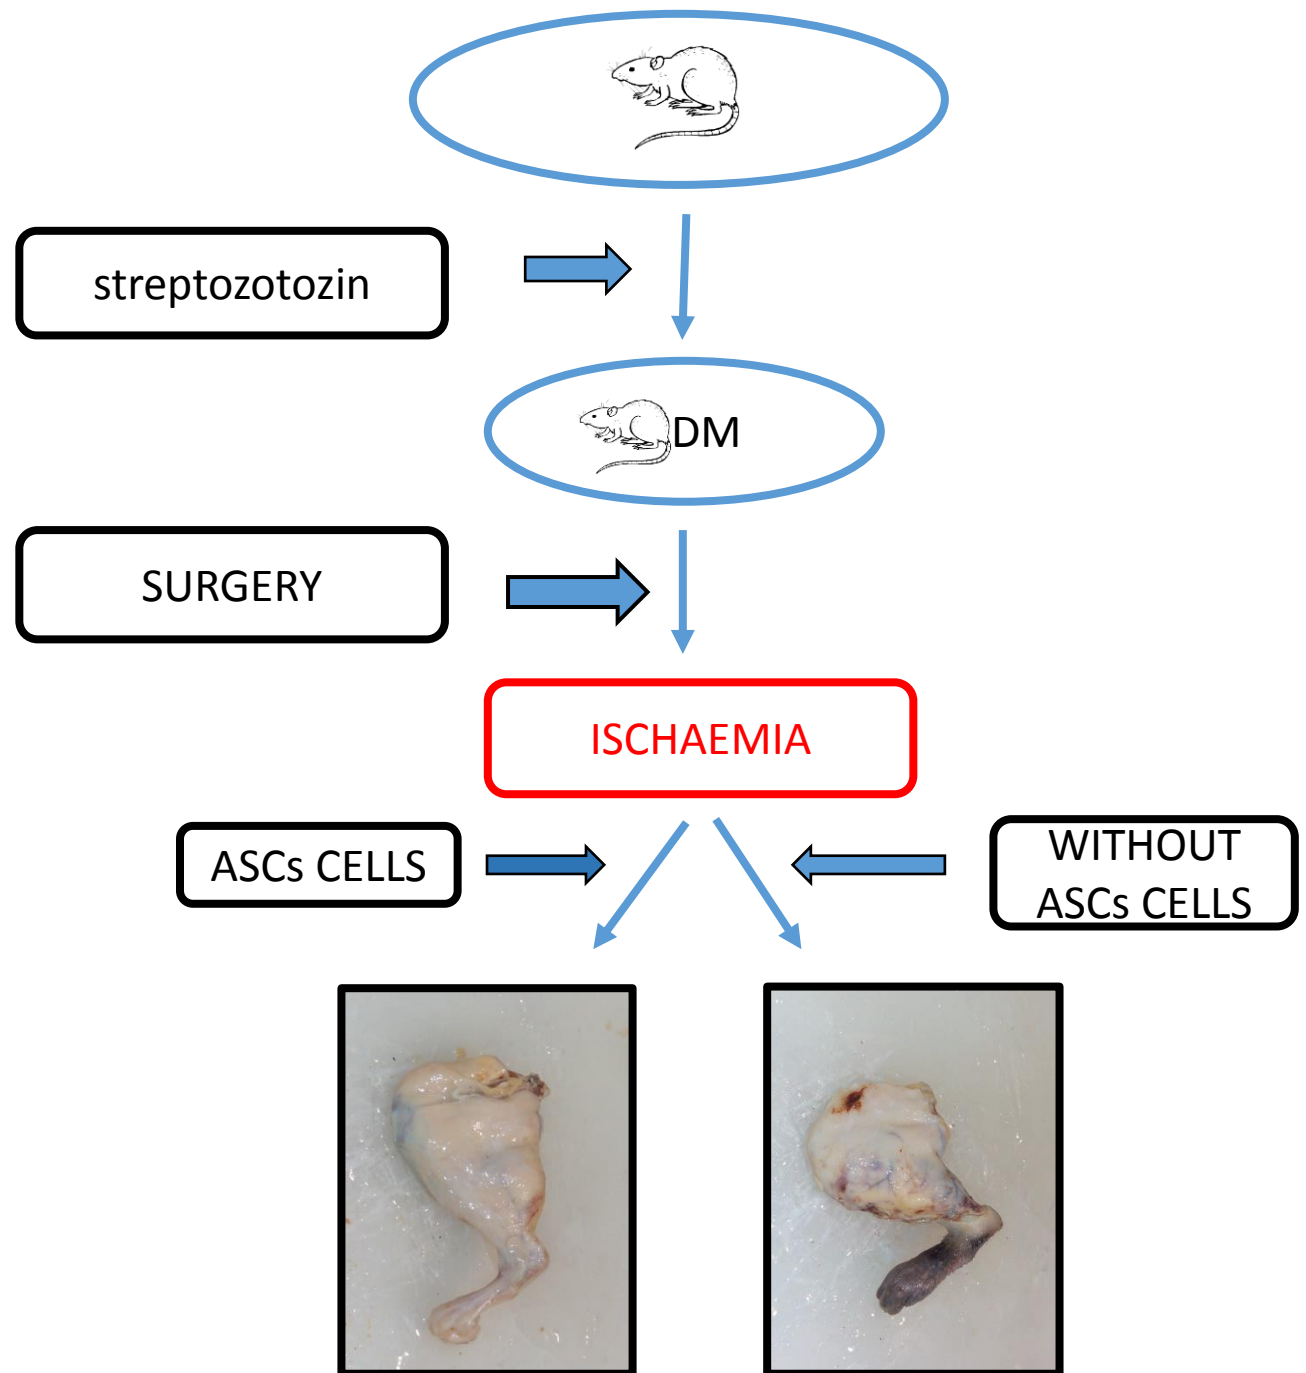

Supplement: peerj-05-3664-s001.pdf [file peerj-05-3664-s001.pdf]
