# Supplementary material for: The effects of allogenic stem cells in a murine model of hind limb diabetic ischemic tissue
Source: PubMed Central journal article supplement (PMC5572534; doi:10.7717/peerj.3664), 2017-08-21
Supplement: peerj-05-3664-s003.pdf [file peerj-05-3664-s003.pdf]

## Flow cytometry

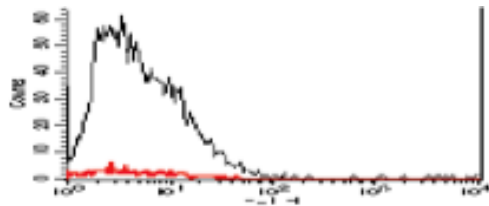

CD-45  
FITC

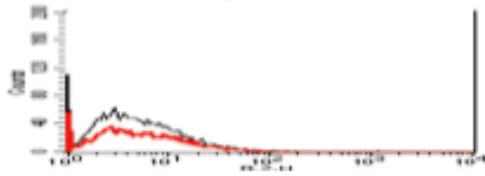

HLA-DR-PE.022

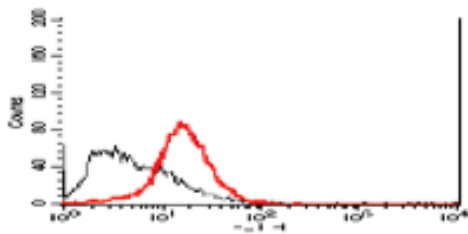

CD-105 FITC

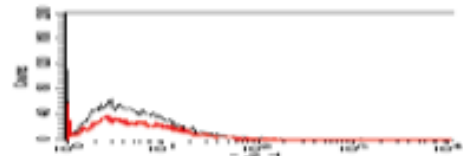

CD 34-PE

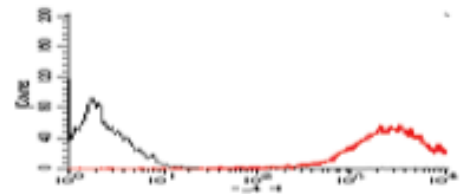

CD-90 APC

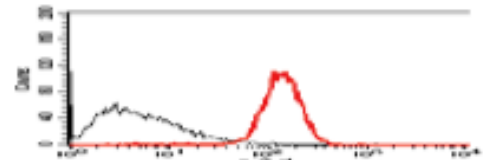

CD-29 PE

**Legend:** Once the cells were thawed and before being used in the treatments, we selected 200,000 cells and performed a study of 3 positive membrane markers (CD90, CD105 and CD29) and 3 negative membrane markers (CD34, HLA-DR and CD45), according to the IFATS criteria

## Adipogenic differentiation

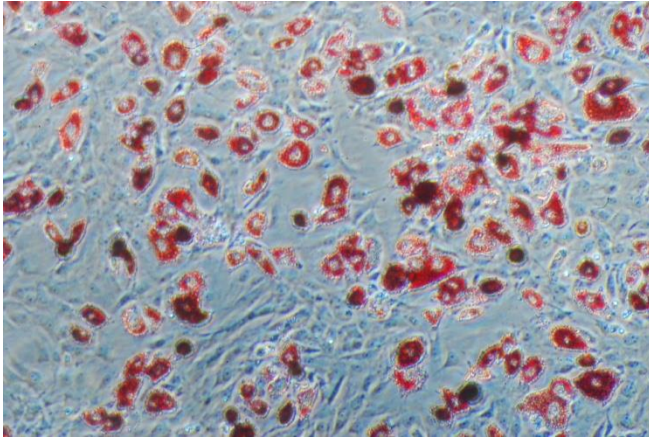

## Osteogenic differentiation

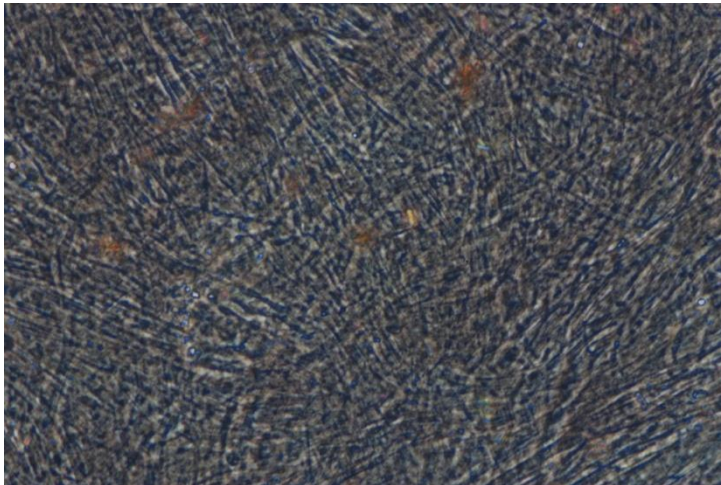

**Legend:** Adipogenic differentiation: lipid accumulation is visualized by staining with Oil Red O  
Osteogenic differentiation: calcium-rich deposits secreted by osteocytes into the extracellular matrix were visualized by staining Alizarin Red S
